# Supplementary material for: Electrically tunable terahertz metamaterials with embedded large-area transparent thin-film transistor arrays
Source: PubMed Central journal article supplement (PMC4802223; doi:10.1038/srep23486), 2016-03-22
Supplement: srep23486-s1.pdf [file srep23486-s1.pdf]

## **Supplementary Information**

### **Electrically tunable terahertz metamaterials with embedded large-area transparent thin-film transistor arrays**

Wei-Zong Xu<sup>1,2,3</sup>, Fang-Fang Ren<sup>1,2,3</sup>, Jiandong Ye<sup>1,2</sup>, Hai Lu<sup>1,3</sup>, Lanju Liang<sup>1</sup>, Xiaoming Huang<sup>1,3</sup>, Mingkai Liu<sup>4</sup>, Ilya V. Shadrivov<sup>4</sup>, David A. Powell<sup>4</sup>, Guang Yu<sup>1,3</sup>, Biaobing Jin<sup>1</sup>, Rong Zhang<sup>1</sup>, Youdou Zheng<sup>1</sup>, Hark Hoe Tan<sup>2</sup> & Chennupati Jagadish<sup>2</sup>

<sup>1</sup>*School of Electronic Science and Engineering, Nanjing University, Nanjing 210093, China*

<sup>2</sup>*Department of Electronic Materials Engineering, Research School of Physics and Engineering, The Australian National University, Canberra, ACT 2601, Australia*

<sup>3</sup>*Collaborative Innovation Center of Advanced Microstructures, Nanjing University, Nanjing 210093, China*

<sup>4</sup>*Nonlinear Physics Centre, Research School of Physics and Engineering, The Australian National University, Canberra, ACT 2601, Australia*

Correspondence and requests for materials should be addressed to F.F.R. (ffren@nju.edu.cn) or H. L. (hailu@nju.edu.cn)

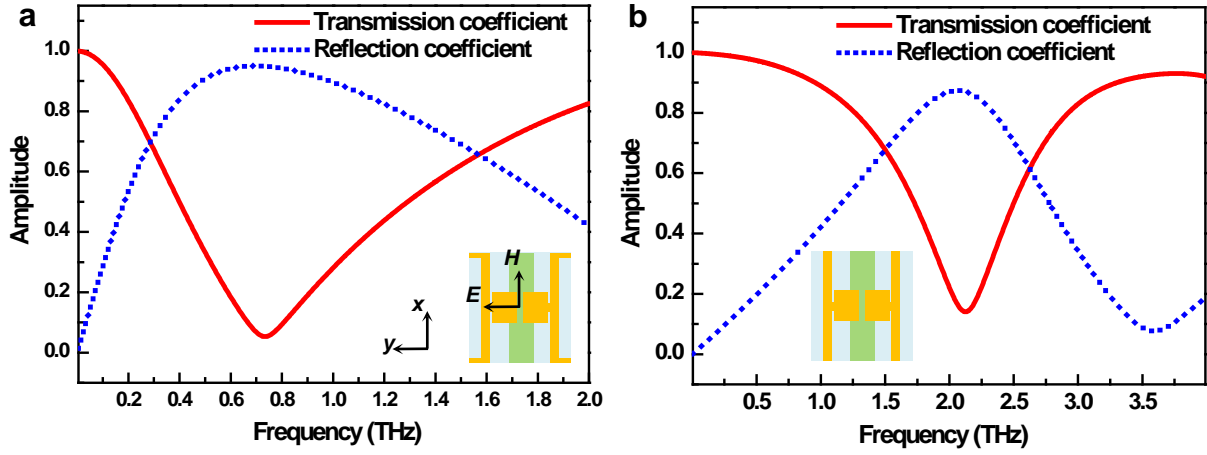

**Figure S1.** Transmission/reflection coefficient of *a*-IGZO TFT-based metamaterials with (a) connected or (b) unconnected metamaterial design. The resonance frequency red-shifts from 2.1 to 0.75 THz due to the connecting design along *y*-direction in our structure.

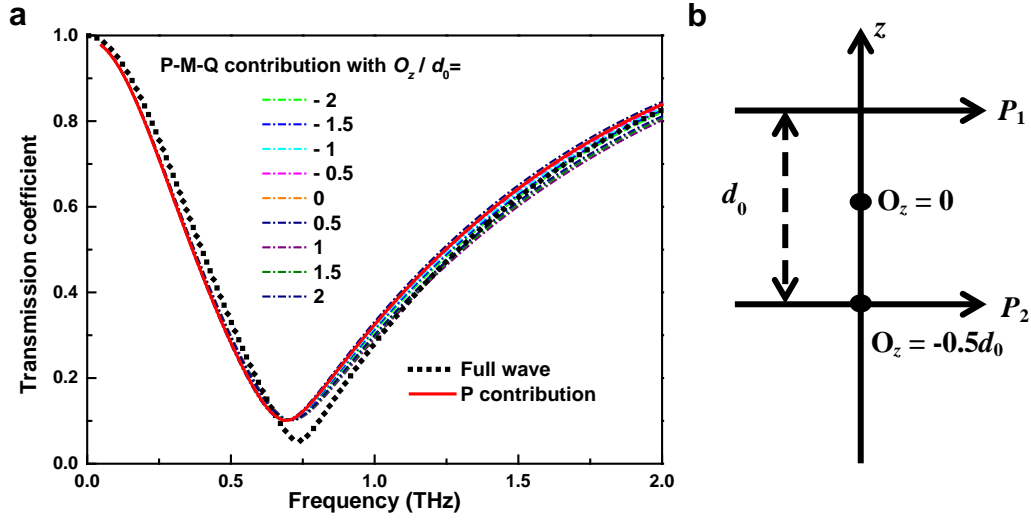

**Figure S2.** The choice of coordinate origin for calculating magnetic dipole ( $M$ ) and electric quadrupole ( $Q$ ) moments. (a) The transmission coefficient (amplitude) calculated by fitting the multipolar expansion model with different choice of coordinate origin  $O_z$ . (b) Schematic of the coordinate origin. Here  $P_1$  and  $P_2$  represent the electric dipole moments of source/drain layer and gate layer, respectively. The distance between these two layers is indicated as  $d_0$ . We found that the different choice of coordinate origin  $O_z$  for calculating  $M$  and  $Q$  results only in a small difference to the transmitted field, while the electric dipole moment ( $P$ ) unambiguously remains dominant to the scattered radiation. Therefore, we simply show the results in Figs. 2c-2e by choosing the origin at the middle of these two metal layers.

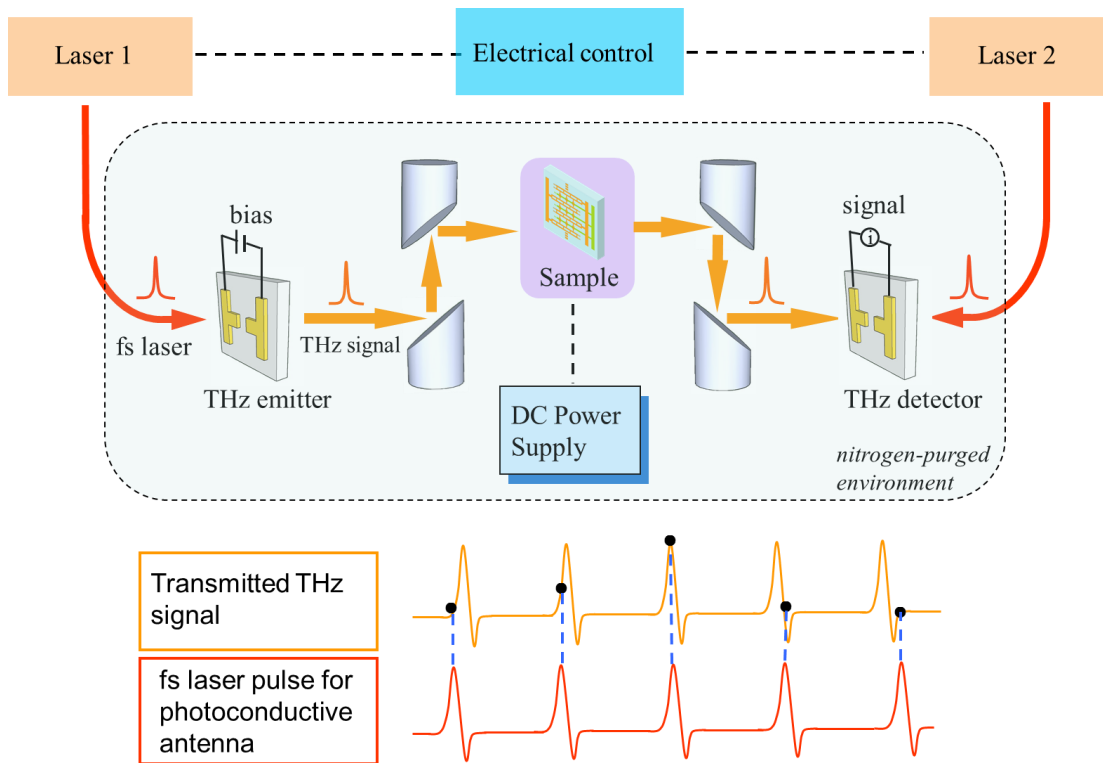

**Figure S3.** Experimental setup for characterizing the tunable THz metamaterial.
